# Supplementary material for: Understanding the relationship between cerebellar structure and social abilities
Source: PubMed Central journal article supplement (PMC10186758; doi:10.1186/s13229-023-00551-8), 2023-05-15
Supplement: 13229_2023_551_MOESM1_ESM.pdf [file 13229_2023_551_MOESM1_ESM.pdf]

## SUPPLEMENTARY MATERIAL

**Supplementary Figure 1.** Illustrations of common parcellation errors and motion artifacts

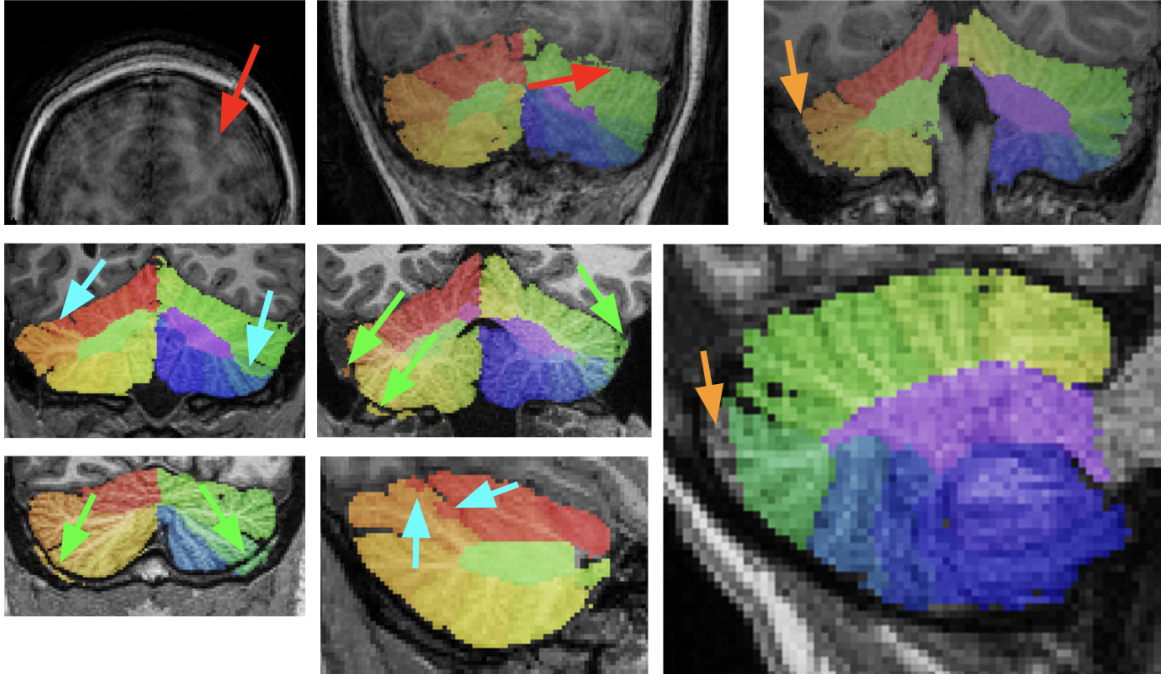

Red arrows: motion related artifacts (ghosting); Orange: Non segmented cerebellar tissue;  
Cyan: Parcellation errors ; Green : non cerebellar tissue labeled as cerebellar tissue

## Supplementary Figure 2. Distribution of clinical variables

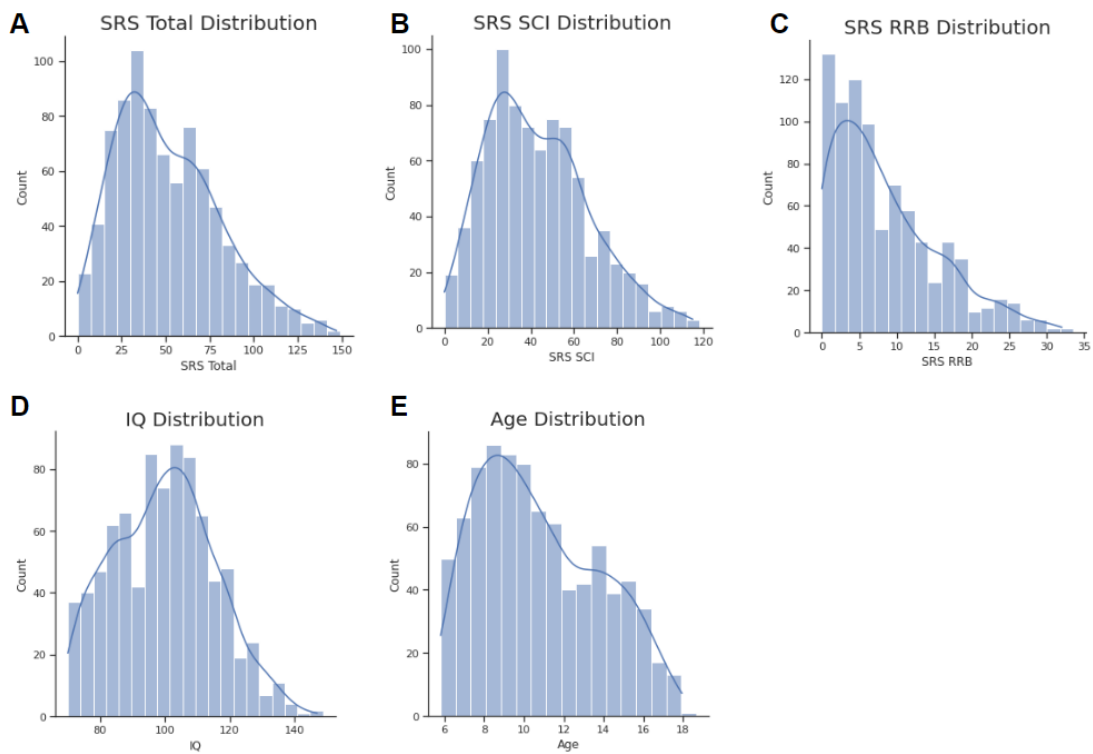

SRS; Social Responsiveness Scale; SCI, social and communication SRS's subscale; RRB, RRB, repetitive behavior SRS's subscale; IQ, Intelligence Quotient.

**Supplementary Figure 3.** Heatmap of correlations between clinical canonical component, anatomical canonical component and individual variables.

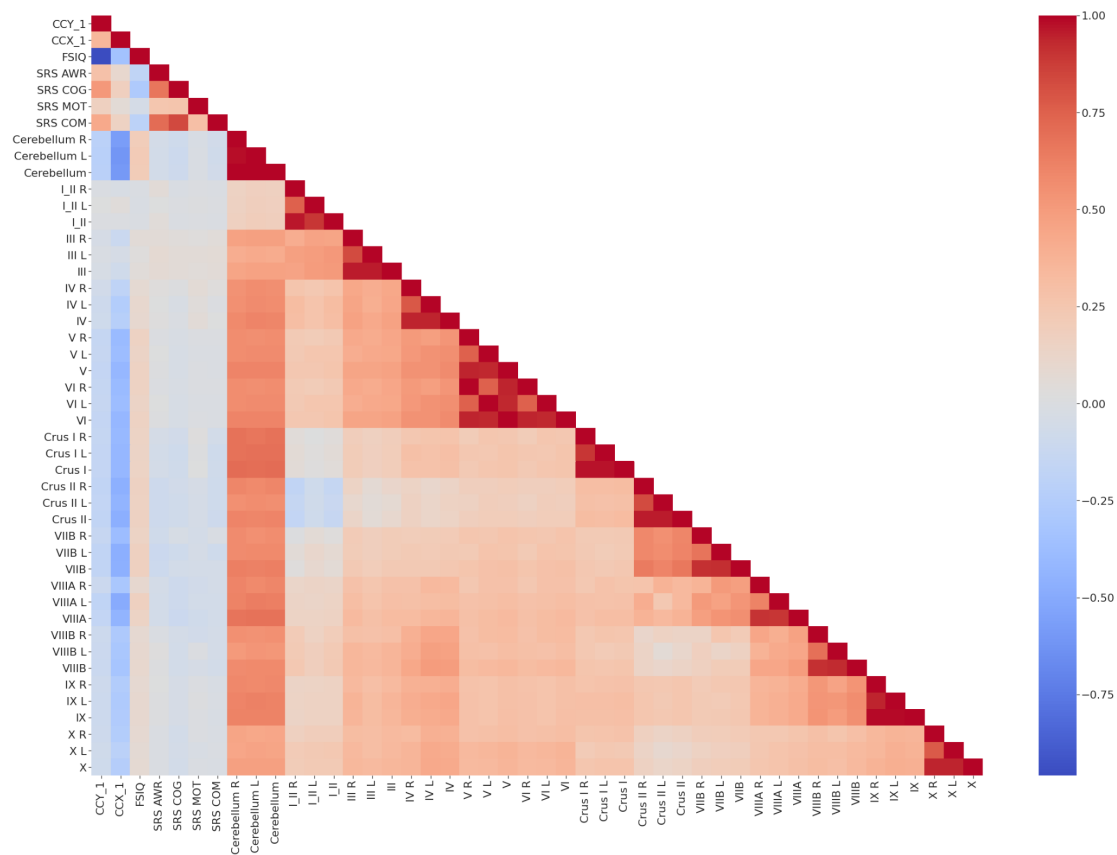

CCY1, Clinical Canonical Variable; CCX1, Anatomical Canonical Variable; FSIQ, Full-Scale Intelligence Quotient; SRS AWR, Social Awareness SRS's subscale; SRS COG, Social Cognition SRS's subscale; SRS COM, Social Communication SRS's subscale; SRS MOT, Social Motivation SRS's subscale

**Supplementary Table 1.** Comparison of subjects included and excluded from the analyses after quality control

| Demographics     | Included (N = 850) | Excluded (N = 559) | Statistics       | P-val       |
|------------------|--------------------|--------------------|------------------|-------------|
| Mean Age (SD)*** | 10.8 (3.0)         | 10.0 (3.1)         | Student Z = -4.7 | < 0.0001*** |
| Sex (%of M)***   | 354/496 (58%)      | 164/395 (71%)      | Chi2 T = 21.5    | < 0.0001*** |
| SRS Total (SD)*  | 51.5 (29.8)        | 55.1 (31.3)        | Student Z = 2.1  | 0.037*      |
| SCI (SD)         | 43.0 (23.6)        | 45.6 (24.7)        | Student Z = 1.9  | 0.061       |
| RRB (SD)*        | 8.5 (7.1)          | 9.5 (7.5)          | Student Z = 2.5  | 0.011*      |
| FSIQ (SD)        | 99.7 (15.7)        | 99.2 (15.0)        | Student Z = -1.0 | 0.328       |

SD, standard deviation; M, male; SRS Total, Social Responsiveness Scale total score; SCI, social and communication SRS's subscale; RRB, RRB, repetitive behavior SRS's subscale; IQ Total, Intelligence Quotient; significant differences are marked by P-val threshold: < 0.05 (\*) or < 0.001 (\*\*\*).

**Supplementary Table 2.** Association between volumes of the cerebellum and social communication impairment scale (SCI), age, sex, IQ, intracranial volume (ICV) and interactions between SCI and covariates.

| LOBULE        | SCI<br>p-value<br>(p-value<br>corr) | SCI<br>coef [95<br>IC]      | AGE<br>p-value | AGE<br>coef [95<br>IC]      | SEX<br>p-value | SEX<br>coef [95<br>IC]        | IQ<br>p-value | IQ<br>coef [95<br>IC]        | ICV<br>p-value | ICV<br>coef [95<br>IC]     | SCI*AGE<br>p-value | SCI*AGE<br>coef [95<br>IC]    | SCI*SEX<br>p-value | SCI*SEX<br>coef [95<br>IC]   | SCI*IQ<br>p-value | SCI*IQ<br>coef [95<br>IC]    | SCI*ICV<br>p-value | SCI*ICV<br>coef [95<br>IC]   | Out. |
|---------------|-------------------------------------|-----------------------------|----------------|-----------------------------|----------------|-------------------------------|---------------|------------------------------|----------------|----------------------------|--------------------|-------------------------------|--------------------|------------------------------|-------------------|------------------------------|--------------------|------------------------------|------|
| Cerebellum    | 0.0034<br>(0.0239*)                 | 0.547<br>[0.181;<br>0.914]  | 0.0064         | 0.612<br>[0.145;<br>1.078]  | 0.0269         | -3.204<br>[-6.402;<br>-0.006] | 0.0804        | 0.086<br>[-0.006;<br>0.178]  | <0.0001        | 0.074<br>[0.062;<br>0.086] | 0.0767             | -0.008<br>[-0.017;<br>0.002]  | 0.4276             | 0.018<br>[-0.047;<br>0.082]  | 0.0766            | -0.002<br>[-0.003;<br>0.000] | 0.1177             | -0.000<br>[-0.000;<br>0.000] | 4    |
| Lobe Ant      | 0.1059<br>(0.1483)                  | 0.051<br>[-0.011;<br>0.113] | 0.0339         | 0.087<br>[0.008;<br>0.166]  | 0.0575         | -0.577<br>[-1.128;<br>-0.026] | 0.2445        | 0.012<br>[-0.003;<br>0.028]  | <0.0001        | 0.008<br>[0.006;<br>0.010] | 0.1576             | -0.001<br>[-0.003;<br>0.000]  | 0.5236             | 0.004<br>[-0.007;<br>0.015]  | 0.2706            | -0.000<br>[-0.001;<br>0.000] | 0.4082             | -0.000<br>[-0.000;<br>0.000] | 3    |
| Lobule VI     | 0.0117<br>(0.0280*)                 | 0.104<br>[0.023;<br>0.185]  | 0.4769         | 0.039<br>[-0.065;<br>0.142] | 0.8570         | 0.129<br>[-0.592;<br>0.850]   | 0.6843        | -0.001<br>[-0.021;<br>0.020] | <0.0001        | 0.012<br>[0.009;<br>0.015] | 0.6060             | -0.001<br>[-0.003;<br>0.002]  | 0.9638             | -0.001<br>[-0.016;<br>0.013] | 0.9979            | -0.000<br>[-0.000;<br>0.000] | 0.0194             | -0.000<br>[-0.000;<br>0.000] | 2    |
| Crus I        | 0.1737<br>(0.1736)                  | 0.092<br>[-0.041;<br>0.225] | 0.6614         | 0.011<br>[-0.159;<br>0.181] | 0.0965         | -0.621<br>[-1.799;<br>0.557]  | 0.3029        | 0.015<br>[-0.018;<br>0.049]  | <0.0001        | 0.016<br>[0.011;<br>0.020] | 0.7069             | -0.000<br>[-0.004;<br>0.003]  | 0.3953             | 0.004<br>[-0.020;<br>0.028]  | 0.3970            | -0.000<br>[-0.001;<br>0.000] | 0.6269             | -0.000<br>[-0.000;<br>0.000] | 2    |
| Crus II       | 0.0120<br>(0.0280*)                 | 0.120<br>[0.026;<br>0.214]  | 0.1955         | 0.059<br>[-0.062;<br>0.180] | 0.5929         | -0.059<br>[-0.892;<br>0.775]  | 0.0204        | 0.026<br>[0.002;<br>0.050]   | <0.0001        | 0.010<br>[0.006;<br>0.013] | 0.1692             | -0.001<br>[-0.004;<br>0.001]  | 0.5249             | -0.009<br>[-0.026;<br>0.008] | 0.0777            | -0.000<br>[-0.001;<br>0.000] | 0.2762             | -0.000<br>[-0.000;<br>0.000] | 5    |
| Lobule VIIIB  | 0.0736<br>(0.1289)                  | 0.027<br>[-0.004;<br>0.093] | 0.3418         | 0.027<br>[-0.035;<br>0.089] | 0.0718         | -0.418<br>[-0.849;<br>0.013]  | 0.0038        | 0.018<br>[0.006;<br>0.030]   | <0.0001        | 0.005<br>[0.003;<br>0.006] | 0.5662             | -0.000<br>[-0.002;<br>0.001]  | 0.1883             | 0.006<br>[-0.003;<br>0.015]  | 0.0370            | -0.000<br>[-0.001;<br>0.000] | 0.4869             | -0.000<br>[-0.000;<br>0.000] | 5    |
| Lobe Post-Inf | 0.1451<br>(0.1693)                  | 0.088<br>[-0.031;<br>0.207] | 0.0039         | 0.228<br>[0.076;<br>0.380]  | 0.0017         | -1.789<br>[-2.848;<br>-0.731] | 0.1538        | 0.022<br>[-0.008;<br>0.052]  | <0.0001        | 0.015<br>[0.011;<br>0.019] | 0.0218             | -0.004<br>[-0.007;<br>-0.001] | 0.2926             | 0.013<br>[-0.009;<br>0.034]  | 0.1128            | -0.000<br>[-0.001;<br>0.000] | 0.7459             | -0.000<br>[-0.000;<br>0.000] | 1    |

P-value for each variate and interaction terms (P-value after Benjamini-Hochberg FDR correction is added between brackets for the SCI variable).

SCI, social and communication SRS's subscale; IQ, Intelligence Quotient; ICV, intracranial volume. CI95%, Confidence Interval

**Supplementary Table 3.** Association between volumes of the cerebellum and SRS Total and RRB.

| LOBULE        | SRS Total |                   | RRB     |                   |
|---------------|-----------|-------------------|---------|-------------------|
|               | P-value   | Corrected P-value | P-value | Corrected P-value |
| Cerebellum    | 0.0105    | 0.0732            | 0.3236  | 0.6789            |
| Lobe Ant      | 0.3593    | 0.3593            | 0.5819  | 0.6789            |
| Lobule VI     | 0.0247    | 0.0863            | 0.5775  | 0.6789            |
| Crus I        | 0.2553    | 0.2979            | 0.8342  | 0.8342            |
| Crus II       | 0.0422    | 0.0986            | 0.1325  | 0.6789            |
| Lobule VIIIB  | 0.1014    | 0.1775            | 0.4276  | 0.6789            |
| Lobe Post-Inf | 0.1904    | 0.2665            | 0.5731  | 0.6789            |

SRS Total, Social Responsiveness Scale total score; RRB, RRB, repetitive behavior SRS's subscale; Benjamini-Hochberg FDR correction.
